# Supplementary material for: The nature and suppression strategies of interfacial reactions in all-solid-state batteries
Source: Royal Society of Chemistry journal article supplement (doi:10.1039/d3ee00870c), 2023-01-01
Supplement: d3ee00870c1.pdf [file d3ee00870c1.pdf]

## **The nature and suppression strategies of interfacial reactions in all- solid-state batteries**

Fucheng Ren,<sup>a</sup> Ziteng liang,<sup>b</sup> Wengao Zhao,<sup>c</sup> Wenhua Zuo,<sup>d</sup> Min Lin,<sup>b</sup> Yuqi Wu,<sup>a</sup> Xuerui Yang,<sup>a</sup> Zhengliang Gong,<sup>\* a</sup> and Yong Yang<sup>\* a, b</sup>

<sup>a</sup> College of Energy, Xiamen University, Xiamen 361102, China. E-mail: yyang@xmu.edu.cn

<sup>b</sup> State Key Laboratory for Physical Chemistry of Solid Surface, Department of Chemistry, College of Chemistry and Chemical Engineering, Xiamen University, Xiamen, 361005, China

<sup>c</sup> Institute of Nanotechnology, Karlsruhe Institute of Technology (KIT), 76344 Eggenstein-Leopoldshafen, Germany

<sup>d</sup> Chemical Sciences and Engineering Division, Argonne National Laboratory, Lemont, IL, 60439, USA

### Interface stability

**The Chemical Stability** between sulfide solid electrolytes (SSEs) and cathode/coating was estimated by the thermodynamic approximation method. The SSEs-cathode/coating interface can be assumed as a pseudo-binary system (A: SSEs, B: cathode/coating), equation 1.

$$C_{interface}(c_A, c_B) = x c_A + (1 - x) c_B \quad (1)$$

Where  $x$  is the molar fraction of SSEs, and  $c_A$  and  $c_B$  are the specific composition of SSEs and cathode/coating. The total energy of pseudo-binary interface is described as the liner combination of SSE and cathode/coating, equation 2.  $E(c_A)$  and  $E(c_B)$  are the ground state energy of SSE and cathode/coating, respectively.

$$\Delta E_{interface}(c_A, c_B, x) = x E(c_A) + (1 - x) E(c_B) \quad (2)$$

The mutual reaction energy  $\Delta E_{D,mutual}(c_A, c_B, x)$  can be calculated by constructing a pseudo-binary phase diagram between SSE and cathode/coating and determining the ratio ( $x$ ) that result in the most negative mutual reaction energy, equation 3:

$$\Delta E_{D,mutual}(c_A, c_B, x) = \min_{x \in [0,1]} \frac{1}{N} [E_{eq, interface}(x c_A + (1 - x) c_B) - x E_D(c_A) - (1 - x) E_D(c_B)] \quad (3)$$

Here,  $E_{eq, interface}$  is the reaction energy of the pseudo-binary phase,  $E_D(c_A)$  and  $E_D(c_B)$  are the decomposition energy of SSE and cathode/coating.  $N$  is the number of atoms involved in the phase equilibrium used to normalization.

**The Electrochemical Stability** of the SSE/cathode interface was evaluated by inducing the extra applied Li chemical potential  $\mu_{Li}^{open, \emptyset}$ :

$$\mu_{Li}^{open, \emptyset} = \mu_{Li}^0 - e\emptyset \quad (4)$$

$\mu_{Li}^0$  and  $\emptyset$  are chemical potential of Li metal and the applied potential referenced to Li metal.

The mutual electrochemical reaction energy  $\Delta E_{D,mutual}^{\emptyset}(c_A, c_B, x, \emptyset)$  between SSE and cathode can be calculated by the following equation:

$$\Delta E_{D,mutual}^{\emptyset}(c_A, c_B, x, \emptyset) = \min_{x \in [0,1]} \frac{1}{N_{gc}} [E_{eq}^{\emptyset}(x c_A + (1 - x) c_B) - x E_D^{\emptyset}(c_A) - (1 - x) E_D^{\emptyset}(c_B)] \quad (5)$$

It should be noted that the normalization factor  $N_{gc}$  in eq 5, unlike  $N$  in eq 3, is the total number of atoms excluding Li.

The applied chemical potential of  $\mu_{Li}$  at fully ( $\mu_{Li}^{open,F}$ ) and half ( $\mu_{Li}^{open,H}$ ) lithiated state of specific cathode materials are different from each other and determined by calculating the Li chemical window of each cathode at fully and half lithiated state shown in Fig S2a.  $\mu_{Li}^{open,F}$  refers to the lowest

chemical potential (corresponding to the highest applied voltage) that the fully-lithiated cathode would not be reduced and  $\mu_{Li}^{open,H}$  refers to the highest chemical potential (corresponding to the lowest applied voltage) that half-lithiated cathode would not be oxidized. The specific value of  $\mu_{Li}^{open,F}$  and  $\mu_{Li}^{open,H}$  for each cathode is listed in Fig. S2b.

### Conductivity of interphase layer

The electronic conductivity of the interface layer greatly influences the cyclability of ASSBs. Experimentally, it is extremely difficult to measure the electronic conductivity of a paper-thin and berried interphase layer between cathode and SSE. By analyzing the phase equilibrium between cathode and sulfide solid electrolytes (SSEs), plenty of transition-metal sulfides ( $M_xS_y$ , M: Ni, Co, and Mn) are formed at interface. All these  $M_xS_y$  possess zero Kohn-Sham band gap as an electronic conductor in the interphase layer, providing the electron conducting net for electrochemical reaction between cathodes and SSEs. It has been proved that a low band gap almost certainly leads to some electronic conductivity.<sup>1</sup> Hence, the percentage of molar fraction ( $f$ ) of these electronically conductive species with the Kohn-sham band gap  $< 0.5$  eV in all interphases formed at interface are calculated which can effectively reflect the electronic conductivity of the interphase layer. For  $x \in [0,1]$  in **eq 3** and **eq 5**, there are several possible phase equilibriums between SSEs and cathodes/coatings. For example, **table S2** lists all possible phase equilibriums between LCO and  $Li_3PS_4$  at fully/half-lithiated of cathode, as well as at chemical potential of  $\mu_{Li}$  at fully/half-lithiated state of LCO (corresponding to the applied voltage). **Table S3** lists the Kohn-Sham band gaps of all possible products. For each phase equilibrium between LCO and  $Li_3PS_4$  listed in **table S2**, the percentage of molar fraction ( $f_i$ ) of electronically conductive species with the Kohn-sham band gap  $< 0.5$  eV in all products was calculated (excepting Li metal in the electrochemical reaction which can be regarded as plating at anode side). Hence, there is a specific  $f_i$  values for each equilibrium ( $f_1, f_2, \dots, f_n$ ,  $n$  is the number of phase equilibriums listed in **Table S2**) and then an average of  $f_1, f_2, \dots$  and  $f_n$  was performed to obtain the final  $f$  as the descriptor to evaluate the electronic conductivity of the interface layer. The bigger  $f$  means the better electronic conductivity of interface layer, and the severe electrochemical reactions occur between cathodes and SSEs

### Geometric analysis

The transport characteristics of Li-ion are highly correlated to the crystal structures. The crystal space of selected structures can be divided into two aspects: space of atoms and interatomic voids.<sup>2</sup> Since the size of interatomic voids is critical for Li conduction, CVAD (Crystal structure Analysis by Voronoi Decomposition)<sup>3</sup> was used to characterize the void spaces and construct the net of interstices in the immobile framework of selected candidates. This code has been widely used to identify the fast ion conductors.<sup>4-8</sup> The threshold of ion that can pass through *a*, *b* and *c* direction of crystal structure is calculated and listed in **table S7**.

### BVSE calculations

The Bond Valence Site Energy (BVSE) model is an effective approach to identify ionic transport channels and calculate the migration energy barrier which is suitable to be used in the high-throughput screening scheme due to its low computational cost.<sup>4,9,10</sup> BVSE method is an extension of Bond valence Sum (BVS) method by taking the Morse type potential term for cation-anion pairs and Coulomb repulsions between mobile ion and ions with the same charge sign into consideration. The BVS method is based on the principle of the local electroneutrality that the ion oxidation state should be close to the bond valence sum  $S_{M-X}$  defined by the following Equation:<sup>11</sup>

$$S_{M-X} = e^{\frac{R_0 - R}{b}} \quad (6)$$

where  $R_0$  and  $b$  are constants depending on the type of ions M and X,  $R$  is the distance to the neighbor counter-ion. The transport channels can be identified as positions in the crystal structure with low bond valence mismatch.<sup>12-14</sup> The BVSE model can be described as equation 7

$$BVSE = \frac{D_0}{2} \sum_i \{(\exp [a(R_{min} - R)] - 1)^2 - 1\} + \sum_{i=1}^N E_{coulomb}(M - M_i) \quad (7)$$

Where  $D_0$ ,  $a$  and  $R_{min}$  are Morse potential parameters determined from plenty of stable compounds. The Morse bond breaking energy of the same interaction in the energy landscapes

of  $M$  and  $M_i$  would be double calculated,  $\frac{D_0}{2}$  was used as a simple average method to prevent overestimating the migration. The Coulomb repulsions between two different cations in equation 7 are calculated by the following equation:

$$E_{coulomb}(M - M_i) = \frac{q_M q_{M_i}}{R_{M - M_i}} \operatorname{erfc} \left[ \frac{R_{M - M_i}}{f(r_M - r_{M_i})} \right] \quad (8)$$

Where  $q$  is the fractional charge of the interacting ions ( $M$  and  $M_i$ ),  $R$  is the bond distance between  $M$  and  $M_i$ ,  $\operatorname{erfc}(x)$  is a complementary error function which has advantage of fast convergence compared with  $\frac{1}{R}$  coulombic interaction,  $r$  refers to the covalent radius of the atom, and the screening factor  $f$  is set to be 0.74 refers to an empirical quantity. By default, we set the cutoff radius for calculating the interactions to be 10 Å and 0.1 Å as the grid resolution.

### **Cell assembly and electrochemical characterization**

Single crystal NCM811 without any modification treatment was mixed with LPS/LGPS/LPSCI (weight ratio: 7:3) by ball milling at 200 rpm for 1h as cathode materials. 100 mg LPS/LGPS/LPSCI was firstly pressed at 30 MPa to obtain SSEs layer, and the cathode composite was put on the one side. A piece of Li-In was put on the other side as anode. Finally, the cell was pressed at 600 MPa to ensure tight contact. During cycling, 50 MPa pressure was applied to the cell. The battery was tested with LAND CT-2001A (Wuhan, China) test system within 2.4 – 3.7 V vs. Li<sup>+</sup>/LiIn at different rate (1C = 200 mA g<sup>-1</sup>) under room temperature (RT). The current density of the first three cycles is set to be cycled at 0.1 C and then increase to 0.3 C for testing the cycle performance of cells assembled with different composite cathodes (NCM811-LPS/LGPS/LPSCI)

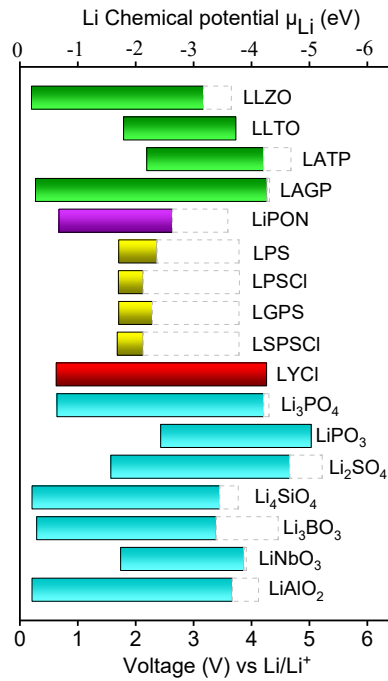

**Fig. S1** Electrochemical stability window of SSEs and coating commonly used at cathode side. The oxidation potential to fully delithiated the material is marked by the dashed line.

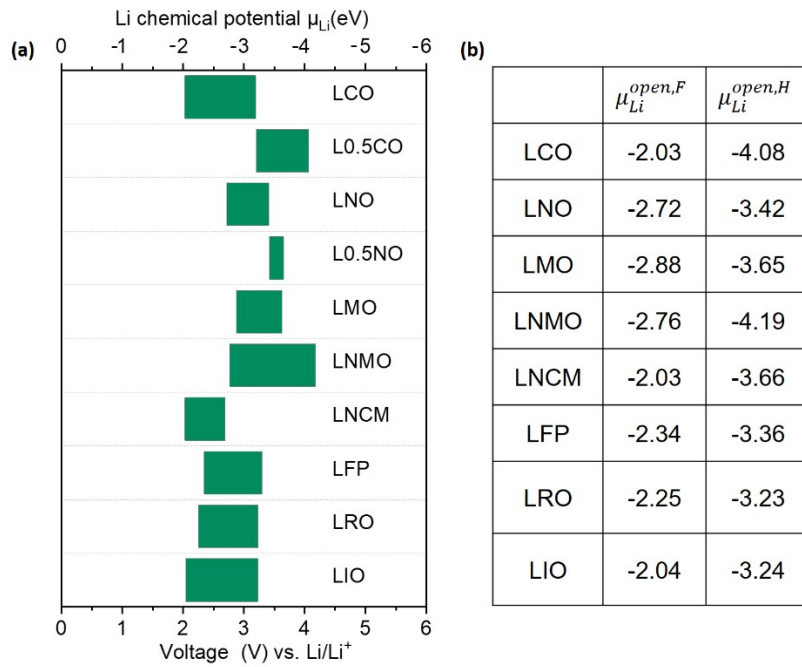

**Fig. S2** Li chemical window of common cathodes (a), and applied chemical potential in fully ( $\mu_{Li}^{open,F}$ ) and half ( $\mu_{Li}^{open,H}$ ) lithiated of cathode (b).

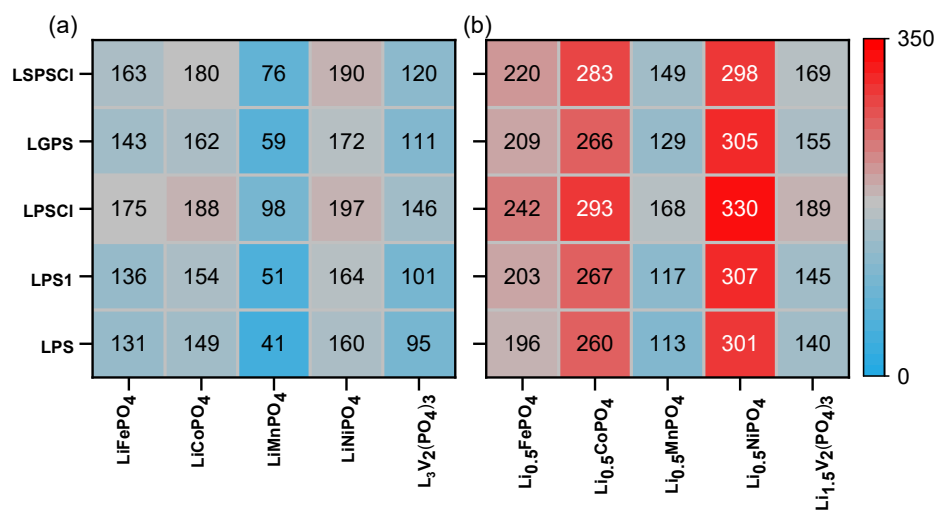

**Fig. S3** Chemical compatibility between polyanion cathodes and SSEs with the largest magnitude of chemical reaction energies ( $-\Delta E_{D,mutual}$ ) of polyanion cathodes /SSEs interface in meV/atom. Chemical reaction energy in fully (a) and half lithiated state of cathodes (b).



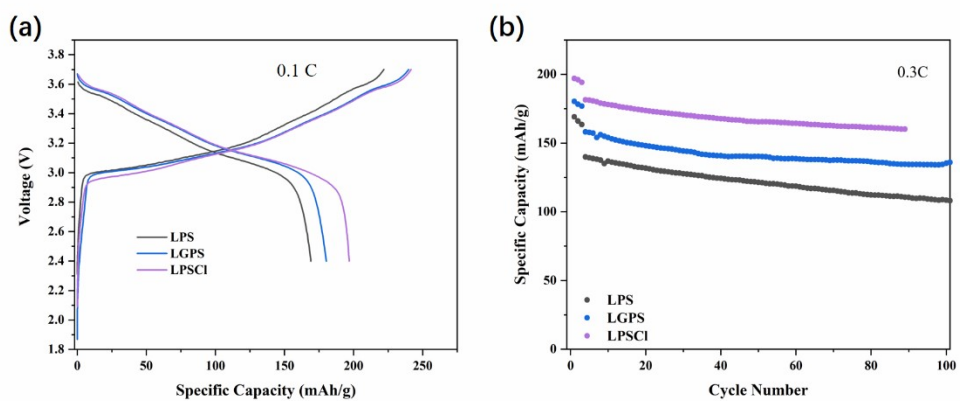

**Fig. S4** (a) The first charge and discharge curves of cells assembled with different composite cathodes NCM-LPS/LGPS/LPSCI at 0.1C (20 mA g<sup>-1</sup>). (b) Cycle performance of the first 100 cycles at 0.3 C (60 mA g<sup>-1</sup>).

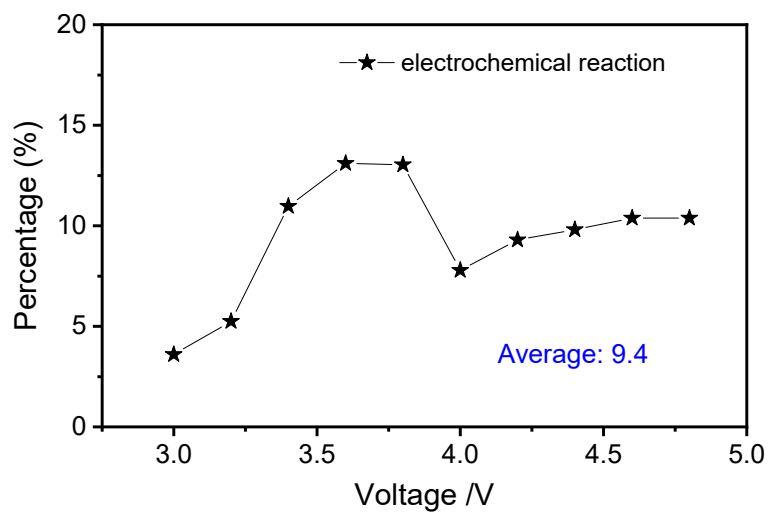

**Fig. S5** Percentage of molar fraction of the species with the Kohn-Sham band gap smaller than 0.5 eV in all interphases formed by the electrochemical reaction between  $\text{LiNi}_{0.5}\text{Mn}_{1.5}\text{O}_4$  and  $\text{LiPO}_2\text{N}$ .

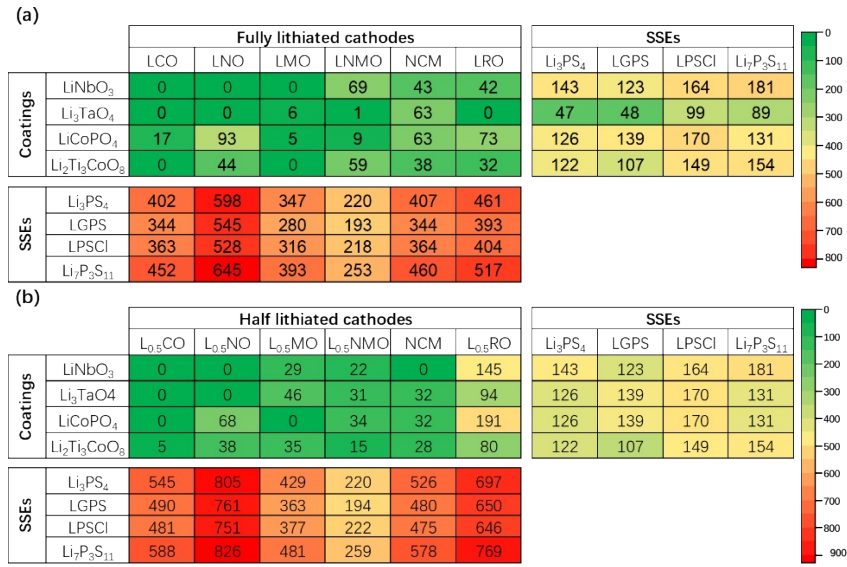

**Fig. S6** Chemical reaction energies ( $-\Delta E_{D,multual}$ ) of cathodes/SSEs and cathodes/coatings in fully (a) and half (b) lithiated state of cathode and coatings/SSEs.

**Binary sulfides and Kohn-Sham band**

Binary sulfides  $E_{\text{hull}} < 5$  meV/atom

Alkali metalsLanthanidesMetalloidsNoble gases

Alkali earth metalsActinidesReactive nonmetals

Transition metalsPost-transition metalsHalogens

|                                                                                                                          |                                                                                                |                                                                                                                            |                                                                                                                                                    |                                                                                                                     |                                                                                                                                          |                                                                      |                                                                                                |                                                                                                                          |                                                                                                |                                                                                                |                                                                      |                                                                                    |                                                                       |                                                                                                                                                                                                                    |                                                                                           |                  |                  |
|--------------------------------------------------------------------------------------------------------------------------|------------------------------------------------------------------------------------------------|----------------------------------------------------------------------------------------------------------------------------|----------------------------------------------------------------------------------------------------------------------------------------------------|---------------------------------------------------------------------------------------------------------------------|------------------------------------------------------------------------------------------------------------------------------------------|----------------------------------------------------------------------|------------------------------------------------------------------------------------------------|--------------------------------------------------------------------------------------------------------------------------|------------------------------------------------------------------------------------------------|------------------------------------------------------------------------------------------------|----------------------------------------------------------------------|------------------------------------------------------------------------------------|-----------------------------------------------------------------------|--------------------------------------------------------------------------------------------------------------------------------------------------------------------------------------------------------------------|-------------------------------------------------------------------------------------------|------------------|------------------|
| <sup>7</sup> Li<br>HS-4.25                                                                                               | <sup>4</sup> Be<br>BeS-3.24                                                                    |                                                                                                                            |                                                                                                                                                    |                                                                                                                     |                                                                                                                                          |                                                                      |                                                                                                |                                                                                                                          |                                                                                                |                                                                                                |                                                                      | <sup>6</sup> B<br>BS <sub>2</sub> -2.43<br>BS <sub>2</sub> -2.55                   | <sup>6</sup> C<br>CS <sub>2</sub> -3.56<br>CS <sub>2</sub> -2.70      | <sup>7</sup> N<br>S <sub>2</sub> N-0.65                                                                                                                                                                            | <sup>8</sup> O<br>SO <sub>2</sub> -5.15<br>SO <sub>2</sub> -3.20<br>S <sub>2</sub> O-2.42 | <sup>9</sup> F   | <sup>10</sup> Ne |
| <sup>11</sup> Na<br>NaS <sub>2</sub> -2.04<br>NaS <sub>2</sub> -2.44<br>NaS <sub>2</sub> -1.25<br>NaS <sub>2</sub> -1.26 | <sup>12</sup> Mg<br>MgS-2.96<br>MgS <sub>2</sub> -1.01                                         |                                                                                                                            |                                                                                                                                                    |                                                                                                                     |                                                                                                                                          |                                                                      |                                                                                                |                                                                                                                          |                                                                                                |                                                                                                |                                                                      | <sup>13</sup> Al<br>AlS <sub>2</sub> -3.24                                         | <sup>14</sup> Si<br>SiS <sub>2</sub> -3.39                            | <sup>15</sup> P<br>P <sub>2</sub> S <sub>2</sub> -2.58<br>P <sub>2</sub> S <sub>2</sub> -2.02<br>P <sub>2</sub> S <sub>2</sub> -2.71<br>P <sub>2</sub> S <sub>2</sub> -2.78<br>P <sub>2</sub> S <sub>2</sub> -2.89 | <sup>16</sup> S<br>S-2.74                                                                 | <sup>17</sup> Cl | <sup>18</sup> Ar |
| <sup>19</sup> K<br>K <sub>2</sub> S <sub>2</sub> -2.31<br>K <sub>2</sub> S <sub>2</sub> -1.17                            | <sup>20</sup> Ca<br>CaS-2.48                                                                   | <sup>21</sup> Sc<br>Sc <sub>2</sub> S <sub>2</sub> -1.07<br>ScS <sub>2</sub> -0.00                                         | <sup>22</sup> Ti<br>TiS <sub>2</sub> -0.00<br>TiS <sub>2</sub> -0.23<br>TiS <sub>2</sub> -0.00<br>TiS <sub>2</sub> -0.00<br>TiS <sub>2</sub> -0.00 | <sup>23</sup> V<br>VS <sub>2</sub> -0.47<br>VS <sub>2</sub> -0.00<br>VS <sub>2</sub> -0.00<br>VS <sub>2</sub> -0.00 | <sup>24</sup> Cr<br>Cr <sub>2</sub> S <sub>2</sub> -0.00<br>Cr <sub>2</sub> S <sub>2</sub> -0.00<br>Cr <sub>2</sub> S <sub>2</sub> -0.00 | <sup>25</sup> Mn<br>MnS <sub>2</sub> -0.00<br>MnS <sub>2</sub> -0.00 | <sup>26</sup> Fe<br>FeS <sub>2</sub> -0.98<br>FeS <sub>2</sub> -0.00<br>FeS <sub>2</sub> -0.00 | <sup>27</sup> Co<br>CoS <sub>2</sub> -0.00<br>CoS <sub>2</sub> -0.00<br>CoS <sub>2</sub> -0.00<br>CoS <sub>2</sub> -0.00 | <sup>28</sup> Ni<br>NiS <sub>2</sub> -0.19<br>NiS <sub>2</sub> -0.00<br>NiS <sub>2</sub> -0.00 | <sup>29</sup> Cu<br>CuS <sub>2</sub> -0.00<br>CuS <sub>2</sub> -0.35<br>CuS <sub>2</sub> -0.00 | <sup>30</sup> Zn<br>ZnS <sub>2</sub> -1.21<br>ZnS <sub>2</sub> -2.00 | <sup>31</sup> Ga<br>GaS <sub>2</sub> -2.03<br>GaS <sub>2</sub> -2.03               | <sup>32</sup> Ge<br>GeS <sub>2</sub> -2.26<br>GeS <sub>2</sub> -0.76  | <sup>33</sup> As<br>AsS <sub>2</sub> -2.20<br>AsS <sub>2</sub> -2.12<br>AsS <sub>2</sub> -1.30                                                                                                                     | <sup>34</sup> Se<br>SeS <sub>2</sub> -1.90                                                | <sup>35</sup> Br | <sup>36</sup> Kr |
| <sup>37</sup> Rb<br>RbS <sub>2</sub> -1.90<br>RbS <sub>2</sub> -1.98                                                     | <sup>38</sup> Sr<br>SrS <sub>2</sub> -2.56<br>SrS <sub>2</sub> -1.49                           | <sup>39</sup> Y<br>YS <sub>2</sub> -1.60<br>YS <sub>2</sub> -0.00<br>YS <sub>2</sub> -0.00                                 | <sup>40</sup> Zr<br>ZrS <sub>2</sub> -1.04<br>ZrS <sub>2</sub> -1.09<br>ZrS <sub>2</sub> -0.00                                                     | <sup>41</sup> Nb<br>NbS <sub>2</sub> -0.00<br>NbS <sub>2</sub> -0.00<br>NbS <sub>2</sub> -0.00                      | <sup>42</sup> Mo<br>MoS <sub>2</sub> -1.58                                                                                               | <sup>43</sup> Tc<br>TcS <sub>2</sub> -1.18                           | <sup>44</sup> Ru<br>RuS <sub>2</sub> -0.68                                                     | <sup>45</sup> Rh<br>RhS <sub>2</sub> -0.00<br>RhS <sub>2</sub> -0.19                                                     | <sup>46</sup> Pd<br>PdS <sub>2</sub> -0.65<br>PdS <sub>2</sub> -0.01                           | <sup>47</sup> Ag<br>Ag <sub>2</sub> S-1.39                                                     | <sup>48</sup> Cd<br>CdS <sub>2</sub> -1.12<br>CdS <sub>2</sub> -1.54 | <sup>49</sup> In<br>In <sub>2</sub> S <sub>2</sub> -0.84<br>InS <sub>2</sub> -1.55 | <sup>50</sup> Sn<br>SnS <sub>2</sub> -1.56<br>SnS <sub>2</sub> -0.96  | <sup>51</sup> Sb<br>Sb <sub>2</sub> S <sub>2</sub> -1.30                                                                                                                                                           | <sup>52</sup> Te<br>Te-0.58                                                               | <sup>53</sup> I  | <sup>54</sup> Xe |
| <sup>55</sup> Cs<br>Cs <sub>2</sub> S <sub>2</sub> -2.10<br>Cs <sub>2</sub> S <sub>2</sub> -1.89                         | <sup>56</sup> Ba<br>BaS <sub>2</sub> -2.21<br>BaS <sub>2</sub> -1.21<br>BaS <sub>2</sub> -1.62 | <sup>57-71</sup> La-Lu<br>HS <sub>2</sub> -1.23<br>HS <sub>2</sub> -1.14<br>HS <sub>2</sub> -0.00<br>HS <sub>2</sub> -0.00 |                                                                                                                                                    | <sup>72</sup> Ta<br>TaS <sub>2</sub> -0.00                                                                          | <sup>73</sup> W<br>WS <sub>2</sub> -1.62                                                                                                 | <sup>74</sup> Re<br>ReS <sub>2</sub> -1.45                           | <sup>75</sup> Os<br>OsS <sub>2</sub> -0.00                                                     | <sup>76</sup> Ir<br>IrS <sub>2</sub> -0.56<br>IrS <sub>2</sub> -0.78                                                     | <sup>77</sup> Pt<br>PtS <sub>2</sub> -1.44<br>PtS <sub>2</sub> -0.47                           | <sup>78</sup> Au<br>AuS <sub>2</sub> -1.91                                                     | <sup>80</sup> Hg<br>HgS <sub>2</sub> -0.00                           | <sup>81</sup> Tl<br>TlS <sub>2</sub> -1.69<br>TlS <sub>2</sub> -0.90               | <sup>82</sup> Pb<br>PbS <sub>2</sub> -0.807<br>PbS <sub>2</sub> -0.99 | <sup>83</sup> Bi<br>BiS <sub>2</sub> -1.50<br>BiS <sub>2</sub> -1.19                                                                                                                                               | <sup>84</sup> Po                                                                          | <sup>85</sup> At | <sup>86</sup> Rn |
| <sup>87</sup> Fr                                                                                                         | <sup>88</sup> Ra                                                                               |                                                                                                                            |                                                                                                                                                    |                                                                                                                     |                                                                                                                                          |                                                                      |                                                                                                |                                                                                                                          |                                                                                                |                                                                                                |                                                                      | <sup>112</sup> Cn                                                                  |                                                                       |                                                                                                                                                                                                                    |                                                                                           |                  |                  |
| <sup>89</sup> Ac                                                                                                         | <sup>90</sup> Th                                                                               | <sup>91</sup> Pa                                                                                                           | <sup>92</sup> U                                                                                                                                    | <sup>93</sup> Np                                                                                                    | <sup>94</sup> Pu                                                                                                                         | <sup>95</sup> Am                                                     | <sup>96</sup> Cm                                                                               | <sup>97</sup> Bk                                                                                                         | <sup>98</sup> Cf                                                                               | <sup>99</sup> Es                                                                               | <sup>100</sup> Fm                                                    | <sup>101</sup> Md                                                                  | <sup>102</sup> No                                                     |                                                                                                                                                                                                                    |                                                                                           |                  |                  |

**Fig. S7** The schematic of Kohn-Sham band gap of binary sulfides throughout the whole Periodic Table. The corresponding binary sulfides of each element are listed below the element symbol and the band gap are followed behind the line.

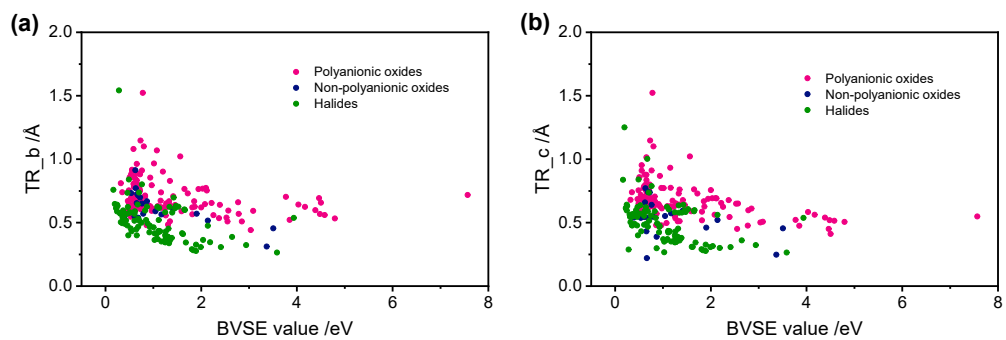

**Fig. S8** Threshold size and BVSE values of candidates pass the filter 4 along (a) *b* and (b) *c* direction of the structure.

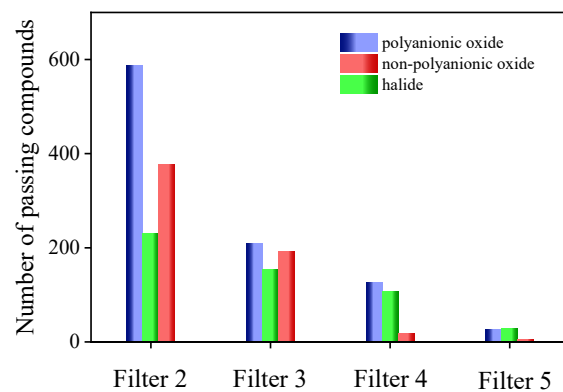

**Fig. S9** Histogram of numbers of compounds for each category that pass each filter in the high-throughput screening. Red, blue, and green color indicates the non-polyanionic oxides, polyanionic oxides, and halide, respectively. Filter 2-5 corresponding to phase stability, excluding the elements trends to form electronically conductive interphase, chemical stability with  $\text{Li}_6\text{PS}_5\text{Cl}$  and NCM, and fast Li ion conductivity.

**Table S1.** Oxidation products of sulfide electrolytes in fully-delithiated state.

| Electrolytes                                                                             | Equilibrium Phase                                          |
|------------------------------------------------------------------------------------------|------------------------------------------------------------|
| $\text{Li}_{10}\text{Ge}(\text{PS}_6)_2$ (LGPS)                                          | $\text{GeS}_2, \text{P}_2\text{S}_7, \text{S}$             |
| $\text{Li}_{9.54}\text{Si}_{1.74}\text{P}_{1.44}\text{S}_{11.7}\text{Cl}_{0.3}$ (LSPSCI) | $\text{P}_2\text{S}_7, \text{SCL}, \text{SiS}_2, \text{S}$ |
| $\text{Li}_6\text{PS}_5\text{Cl}$ (LPSCI)                                                | $\text{SCL}, \text{P}_2\text{S}_7, \text{S}$               |
| $\text{Li}_7\text{P}_3\text{S}_{11}$                                                     | $\text{P}_2\text{S}_7, \text{S}$                           |
| $\text{Li}_3\text{PS}_4$                                                                 | $\text{P}_2\text{S}_7, \text{S}$                           |

**Table S2.** Phase equilibriums of chemical and electrochemical reaction between LCO and Li<sub>3</sub>PS<sub>4</sub>.

| Reaction type                                                                                                                                                                                         | State of LCO    | Phase equilibrium between LCO and Li <sub>3</sub> PS <sub>4</sub>                                                                                                                                                                |
|-------------------------------------------------------------------------------------------------------------------------------------------------------------------------------------------------------|-----------------|----------------------------------------------------------------------------------------------------------------------------------------------------------------------------------------------------------------------------------|
| Chemical reaction                                                                                                                                                                                     | fully lithiated | $0.03 \text{ Li}_3\text{PS}_4 + 0.97 \text{ LiCoO}_2 \rightarrow 0.03 \text{ Li}_3\text{PO}_4 + 0.073 \text{ Li}_{10}\text{Co}_4\text{O}_9 + 0.679 \text{ CoO} + 0.121 \text{ Li}_2\text{SO}_4$                                  |
|                                                                                                                                                                                                       |                 | $0.189 \text{ Li}_3\text{PS}_4 + 0.811 \text{ LiCoO}_2 \rightarrow 0.08 \text{ Co}_9\text{S}_8 + 0.095 \text{ Li}_6\text{CoO}_4 + 0.189 \text{ Li}_3\text{PO}_4 + 0.121 \text{ Li}_2\text{SO}_4$                                 |
|                                                                                                                                                                                                       |                 | $0.207 \text{ Li}_3\text{PS}_4 + 0.793 \text{ LiCoO}_2 \rightarrow 0.088 \text{ Co}_9\text{S}_8 + 0.207 \text{ Li}_3\text{PO}_4 + 0.121 \text{ Li}_2\text{SO}_4 + 0.275 \text{ Li}_2\text{O}$                                    |
|                                                                                                                                                                                                       |                 | $0.258 \text{ Li}_3\text{PS}_4 + 0.742 \text{ LiCoO}_2 \rightarrow 0.082 \text{ Co}_9\text{S}_8 + 0.258 \text{ Li}_3\text{PO}_4 + 0.113 \text{ Li}_2\text{SO}_4 + 0.258 \text{ Li}_2\text{S}$                                    |
|                                                                                                                                                                                                       |                 | $0.314 \text{ Li}_3\text{PS}_4 + 0.686 \text{ LiCoO}_2 \rightarrow 0.314 \text{ Li}_3\text{PO}_4 + 0.029 \text{ Li}_2\text{SO}_4 + 0.229 \text{ Co}_3\text{S}_4 + 0.314 \text{ Li}_2\text{S}$                                    |
|                                                                                                                                                                                                       |                 | $0.333 \text{ Li}_3\text{PS}_4 + 0.667 \text{ LiCoO}_2 \rightarrow 0.167 \text{ CoS}_2 + 0.333 \text{ Li}_3\text{PO}_4 + 0.167 \text{ Co}_3\text{S}_4 + 0.333 \text{ Li}_2\text{S}$                                              |
|                                                                                                                                                                                                       | half lithiated  | $0.022 \text{ Li}_3\text{PS}_4 + 0.978 \text{ Li}_{0.5}\text{Co}_2\text{O}_2 \rightarrow 0.311 \text{ LiCoO}_2 + 0.222 \text{ Co}_3\text{O}_4 + 0.022 \text{ Li}_3\text{PO}_4 + 0.089 \text{ Li}_2\text{SO}_4$                   |
|                                                                                                                                                                                                       |                 | $0.04 \text{ Li}_3\text{PS}_4 + 0.96 \text{ Li}_{0.5}\text{Co}_2\text{O}_2 \rightarrow 0.16 \text{ LiCoO}_2 + 0.04 \text{ Li}_3\text{PO}_4 + 0.8 \text{ CoO} + 0.16 \text{ Li}_2\text{SO}_4$                                     |
|                                                                                                                                                                                                       |                 | $0.045 \text{ Li}_3\text{PS}_4 + 0.955 \text{ Li}_{0.5}\text{Co}_2\text{O}_2 \rightarrow 0.045 \text{ Li}_3\text{PO}_4 + 0.012 \text{ Li}_{10}\text{Co}_4\text{O}_9 + 0.907 \text{ CoO} + 0.179 \text{ Li}_2\text{SO}_4$         |
|                                                                                                                                                                                                       |                 | $0.215 \text{ Li}_3\text{PS}_4 + 0.785 \text{ Li}_{0.5}\text{Co}_2\text{O}_2 \rightarrow 0.086 \text{ Co}_9\text{S}_8 + 0.009 \text{ Li}_6\text{CoO}_4 + 0.215 \text{ Li}_3\text{PO}_4 + 0.169 \text{ Li}_2\text{SO}_4$          |
|                                                                                                                                                                                                       |                 | $0.216 \text{ Li}_3\text{PS}_4 + 0.784 \text{ Li}_{0.5}\text{Co}_2\text{O}_2 \rightarrow 0.087 \text{ Co}_9\text{S}_8 + 0.216 \text{ Li}_3\text{PO}_4 + 0.169 \text{ Li}_2\text{SO}_4 + 0.027 \text{ Li}_2\text{O}$              |
|                                                                                                                                                                                                       |                 | $0.222 \text{ Li}_3\text{PS}_4 + 0.778 \text{ Li}_{0.5}\text{Co}_2\text{O}_2 \rightarrow 0.086 \text{ Co}_9\text{S}_8 + 0.222 \text{ Li}_3\text{PO}_4 + 0.168 \text{ Li}_2\text{SO}_4 + 0.027 \text{ Li}_2\text{S}$              |
|                                                                                                                                                                                                       |                 | $0.284 \text{ Li}_3\text{PS}_4 + 0.716 \text{ Li}_{0.5}\text{Co}_2\text{O}_2 \rightarrow 0.284 \text{ Li}_3\text{PO}_4 + 0.075 \text{ Li}_2\text{SO}_4 + 0.239 \text{ Co}_3\text{S}_4 + 0.104 \text{ Li}_2\text{S}$              |
|                                                                                                                                                                                                       |                 | $0.333 \text{ Li}_3\text{PS}_4 + 0.667 \text{ Li}_{0.5}\text{Co}_2\text{O}_2 \rightarrow 0.417 \text{ CoS}_2 + 0.333 \text{ Li}_3\text{PO}_4 + 0.083 \text{ Co}_3\text{S}_4 + 0.167 \text{ Li}_2\text{S}$                        |
| Electrochemical reaction                                                                                                                                                                              | 2.03 V          | $0.048 \text{ Li}_3\text{PS}_4 + 0.952 \text{ LiCoO}_2 \rightarrow 0.571 \text{ Li} + 0.952 \text{ CoO} + 0.19 \text{ Li}_2\text{SO}_4 + 0.048 \text{ Li}_3\text{PO}_4$                                                          |
|                                                                                                                                                                                                       |                 | $0.217 \text{ Li}_3\text{PS}_4 + 0.783 \text{ LiCoO}_2 \rightarrow 0.435 \text{ Li} + 0.087 \text{ Co}_9\text{S}_8 + 0.174 \text{ Li}_2\text{SO}_4 + 0.217 \text{ Li}_3\text{PO}_4$                                              |
|                                                                                                                                                                                                       |                 | $0.268 \text{ Li}_3\text{PS}_4 + 0.732 \text{ LiCoO}_2 \rightarrow 0.537 \text{ Li} + 0.244 \text{ Co}_3\text{S}_4 + 0.098 \text{ Li}_2\text{SO}_4 + 0.268 \text{ Li}_3\text{PO}_4$                                              |
|                                                                                                                                                                                                       |                 | $0.333 \text{ Li}_3\text{PS}_4 + 0.667 \text{ LiCoO}_2 \rightarrow 0.667 \text{ Li} + 0.667 \text{ CoS}_2 + 0.333 \text{ Li}_3\text{PO}_4$                                                                                       |
|                                                                                                                                                                                                       | 4.07 V          | $0.032 \text{ Li}_3\text{PS}_4 + 0.968 \text{ Li}_{0.5}\text{Co}_2\text{O}_2 \rightarrow 0.294 \text{ Li} + 0.041 \text{ Co}_{23}\text{O}_{32} + 0.032 \text{ LiCoPO}_4 + 0.127 \text{ Li}_2\text{SO}_4$                         |
|                                                                                                                                                                                                       |                 | $0.033 \text{ Li}_3\text{PS}_4 + 0.967 \text{ Li}_{0.5}\text{Co}_2\text{O}_2 \rightarrow 0.319 \text{ Li} + 0.016 \text{ Co}_3(\text{PO}_4)_2 + 0.04 \text{ Co}_{23}\text{O}_{32} + 0.131 \text{ Li}_2\text{SO}_4$               |
|                                                                                                                                                                                                       |                 | $0.039 \text{ Li}_3\text{PS}_4 + 0.961 \text{ Li}_{0.5}\text{Co}_2\text{O}_2 \rightarrow 0.442 \text{ Li} + 0.077 \text{ Li}_2\text{Co}(\text{SO}_4)_2 + 0.019 \text{ Co}_3(\text{PO}_4)_2 + 0.036 \text{ Co}_{23}\text{O}_{32}$ |
|                                                                                                                                                                                                       |                 | $0.047 \text{ Li}_3\text{PS}_4 + 0.953 \text{ Li}_{0.5}\text{Co}_2\text{O}_2 \rightarrow 0.617 \text{ Li} + 0.023 \text{ Co}_3(\text{PO}_4)_2 + 0.03 \text{ Co}_{23}\text{O}_{32} + 0.188 \text{ CoSO}_4$                        |
|                                                                                                                                                                                                       |                 | $0.05 \text{ Li}_3\text{PS}_4 + 0.95 \text{ Li}_{0.5}\text{Co}_2\text{O}_2 \rightarrow 0.625 \text{ Li} + 0.025 \text{ Co}_3(\text{PO}_4)_2 + 0.225 \text{ Co}_3\text{O}_4 + 0.2 \text{ CoSO}_4$                                 |
|                                                                                                                                                                                                       |                 | $0.065 \text{ Li}_3\text{PS}_4 + 0.935 \text{ Li}_{0.5}\text{Co}_2\text{O}_2 \rightarrow 0.661 \text{ Li} + 0.032 \text{ Co}_3(\text{PO}_4)_2 + 0.581 \text{ CoO} + 0.258 \text{ CoSO}_4$                                        |
|                                                                                                                                                                                                       |                 | $0.148 \text{ Li}_3\text{PS}_4 + 0.852 \text{ Li}_{0.5}\text{Co}_2\text{O}_2 \rightarrow 0.87 \text{ Li} + 0.074 \text{ Co}_3(\text{PO}_4)_2 + 0.039 \text{ Co}_9\text{S}_8 + 0.278 \text{ CoSO}_4$                              |
|                                                                                                                                                                                                       |                 | $0.171 \text{ Li}_3\text{PS}_4 + 0.829 \text{ Li}_{0.5}\text{Co}_2\text{O}_2 \rightarrow 0.927 \text{ Li} + 0.085 \text{ Co}_3(\text{PO}_4)_2 + 0.11 \text{ Co}_3\text{S}_4 + 0.244 \text{ CoSO}_4$                              |
|                                                                                                                                                                                                       |                 | $0.2 \text{ Li}_3\text{PS}_4 + 0.8 \text{ Li}_{0.5}\text{Co}_2\text{O}_2 \rightarrow \text{Li} + 0.1 \text{ Co}_3(\text{PO}_4)_2 + 0.3 \text{ CoS}_2 + 0.2 \text{ CoSO}_4$                                                       |
|                                                                                                                                                                                                       |                 | $0.226 \text{ Li}_3\text{PS}_4 + 0.774 \text{ Li}_{0.5}\text{Co}_2\text{O}_2 \rightarrow 1.066 \text{ Li} + 0.113 \text{ Co}_2\text{P}_2\text{O}_7 + 0.358 \text{ CoS}_2 + 0.189 \text{ CoSO}_4$                                 |
| $0.346 \text{ Li}_3\text{PS}_4 + 0.654 \text{ Li}_{0.5}\text{Co}_2\text{O}_2 \rightarrow 1.365 \text{ Li} + 0.173 \text{ Co}_2\text{P}_2\text{O}_7 + 0.308 \text{ CoS}_2 + 0.096 \text{ S}_8\text{O}$ |                 |                                                                                                                                                                                                                                  |
| $0.404 \text{ Li}_3\text{PS}_4 + 0.596 \text{ Li}_{0.5}\text{Co}_2\text{O}_2 \rightarrow 1.511 \text{ Li} + 0.494 \text{ CoS}_2 + 0.079 \text{ S}_8\text{O} + 0.101 \text{ CoP}_4\text{O}_{11}$       |                 |                                                                                                                                                                                                                                  |
| $0.973 \text{ Li}_3\text{PS}_4 + 0.027 \text{ Li}_{0.5}\text{Co}_2\text{O}_2 \rightarrow 2.932 \text{ Li} + 0.027 \text{ CoS}_2 + 0.054 \text{ S}_8\text{O} + 0.486 \text{ P}_2\text{S}_7$            |                 |                                                                                                                                                                                                                                  |



**Table S3.** Kohn-Sham band gap of compounds formed in the phase equilibrium between  $\text{LiCoO}_2$  and  $\text{Li}_3\text{PS}_4/\text{Li}_6\text{PS}_5\text{Cl}$ .

| Species                               | Source     | Band Gap / eV |
|---------------------------------------|------------|---------------|
| $\text{Co}_9\text{S}_8$               | mp-1513    | 0             |
| $\text{Co}_3\text{S}_4$               | mp-943     | 0             |
| $\text{CoS}_2$                        | mp-2070    | 0             |
| $\text{Co}_{23}\text{O}_{32}$         | mp-705564  | 0             |
| $\text{P}_2\text{S}_7$                | mp-1006118 | 2.023         |
| $\text{S}_8\text{O}$                  | mp-27465   | 2.424         |
| $\text{CoO}$                          | mp-22408   | 0.843         |
| $\text{Li}_2\text{S}$                 | mp-1153    | 3.538         |
| $\text{Li}_2\text{O}$                 | mp-1960    | 4.992         |
| $\text{CoSO}_4$                       | mp-19379   | 2.167         |
| $\text{Li}_2\text{SO}_4$              | mp-558382  | 6.22          |
| $\text{Li}_{10}\text{Co}_4\text{O}_9$ | mp-773128  | 1.401         |
| $\text{Li}_6\text{CoO}_4$             | mp-18925   | 1.964         |
| $\text{Co}_3(\text{PO}_4)_2$          | mp-19264   | 2.9           |
| $\text{Li}_3\text{PO}_4$              | mp-13725   | 5.838         |
| $\text{Co}_2\text{P}_2\text{O}_7$     | mp-550468  | 2.088         |
| $\text{CoP}_4\text{O}_{11}$           | mp-759681  | 3.174         |
| $\text{LiCl}$                         | mp-22905   | 6.395         |
| $\text{LiClO}_4$                      | mp-30301   | 5.774         |
| $\text{ClO}_2$                        | mp-23207   | 0.966         |
| $\text{Co}_2\text{PClO}_4$            | mp-622183  | 2.632         |
| $\text{SCl}$                          | mp-28096   | 2.981         |
| $\text{PCl}_3\text{O}$                | mp-27277   | 4.684         |

**Table S4.** phase equilibriums of chemical and electrochemical reaction between LCO and Li<sub>6</sub>PS<sub>5</sub>Cl.

| Reaction type            | State of LCO    | Phase equilibrium between LCO and Li <sub>6</sub> PS <sub>5</sub> Cl                                                                                                                                                                                   |
|--------------------------|-----------------|--------------------------------------------------------------------------------------------------------------------------------------------------------------------------------------------------------------------------------------------------------|
| Chemical reaction        | fully lithiated | $0.024 \text{ Li}_6\text{PS}_5\text{Cl} + 0.976 \text{ LiCoO}_2 \rightarrow 0.078 \text{ Li}_{10}\text{Co}_4\text{O}_9 + 0.024 \text{ Li}_3\text{PO}_4 + 0.122 \text{ Li}_2\text{SO}_4 + 0.663 \text{ CoO} + 0.024 \text{ LiCl}$                       |
|                          |                 | $0.15 \text{ Li}_6\text{PS}_5\text{Cl} + 0.85 \text{ LiCoO}_2 \rightarrow 0.15 \text{ Li}_6\text{CoO}_4 + 0.15 \text{ Li}_3\text{PO}_4 + 0.078 \text{ Co}_9\text{S}_8 + 0.126 \text{ Li}_2\text{SO}_4 + 0.15 \text{ LiCl}$                             |
|                          |                 | $0.172 \text{ Li}_6\text{PS}_5\text{Cl} + 0.828 \text{ LiCoO}_2 \rightarrow 0.46 \text{ Li}_2\text{O} + 0.172 \text{ Li}_3\text{PO}_4 + 0.092 \text{ Co}_9\text{S}_8 + 0.126 \text{ Li}_2\text{SO}_4 + 0.172 \text{ LiCl}$                             |
|                          |                 | $0.258 \text{ Li}_6\text{PS}_5\text{Cl} + 0.742 \text{ LiCoO}_2 \rightarrow 0.258 \text{ Li}_3\text{PO}_4 + 0.515 \text{ Li}_2\text{S} + 0.082 \text{ Co}_9\text{S}_8 + 0.113 \text{ Li}_2\text{SO}_4 + 0.258 \text{ LiCl}$                            |
|                          |                 | $0.314 \text{ Li}_6\text{PS}_5\text{Cl} + 0.686 \text{ LiCoO}_2 \rightarrow 0.314 \text{ Li}_3\text{PO}_4 + 0.629 \text{ Li}_2\text{S} + 0.029 \text{ Li}_2\text{SO}_4 + 0.229 \text{ Co}_3\text{S}_4 + 0.314 \text{ LiCl}$                            |
|                          |                 | $0.333 \text{ Li}_6\text{PS}_5\text{Cl} + 0.667 \text{ LiCoO}_2 \rightarrow 0.333 \text{ Li}_3\text{PO}_4 + 0.667 \text{ Li}_2\text{S} + 0.333 \text{ Co}_2\text{S}_3 + 0.333 \text{ LiCl}$                                                            |
|                          |                 | $0.018 \text{ Li}_6\text{PS}_5\text{Cl} + 0.982 \text{ Li}_{0.5}\text{Co}_1\text{O}_2 \rightarrow 0.351 \text{ LiCoO}_2 + 0.211 \text{ Co}_3\text{O}_4 + 0.018 \text{ Li}_3\text{PO}_4 + 0.088 \text{ Li}_2\text{SO}_4 + 0.018 \text{ LiCl}$           |
|                          |                 | $0.03 \text{ Li}_6\text{PS}_5\text{Cl} + 0.97 \text{ Li}_{0.5}\text{Co}_1\text{O}_2 \rightarrow 0.242 \text{ LiCoO}_2 + 0.03 \text{ Li}_3\text{PO}_4 + 0.152 \text{ Li}_2\text{SO}_4 + 0.727 \text{ CoO} + 0.03 \text{ LiCl}$                          |
|                          | half lithiated  | $0.036 \text{ Li}_6\text{PS}_5\text{Cl} + 0.964 \text{ Li}_{0.5}\text{Co}_1\text{O}_2 \rightarrow 0.019 \text{ Li}_{10}\text{Co}_4\text{O}_9 + 0.036 \text{ Li}_3\text{PO}_4 + 0.181 \text{ Li}_2\text{SO}_4 + 0.887 \text{ CoO} + 0.036 \text{ LiCl}$ |
|                          |                 | $0.171 \text{ Li}_6\text{PS}_5\text{Cl} + 0.829 \text{ Li}_{0.5}\text{Co}_1\text{O}_2 \rightarrow 0.067 \text{ Li}_6\text{CoO}_4 + 0.171 \text{ Li}_3\text{PO}_4 + 0.085 \text{ Co}_9\text{S}_8 + 0.177 \text{ Li}_2\text{SO}_4 + 0.171 \text{ LiCl}$  |
|                          |                 | $0.181 \text{ Li}_6\text{PS}_5\text{Cl} + 0.819 \text{ Li}_{0.5}\text{Co}_1\text{O}_2 \rightarrow 0.209 \text{ Li}_2\text{O} + 0.181 \text{ Li}_3\text{PO}_4 + 0.091 \text{ Co}_9\text{S}_8 + 0.176 \text{ Li}_2\text{SO}_4 + 0.181 \text{ LiCl}$      |
|                          |                 | $0.222 \text{ Li}_6\text{PS}_5\text{Cl} + 0.778 \text{ Li}_{0.5}\text{Co}_1\text{O}_2 \rightarrow 0.222 \text{ Li}_3\text{PO}_4 + 0.249 \text{ Li}_2\text{S} + 0.086 \text{ Co}_9\text{S}_8 + 0.168 \text{ Li}_2\text{SO}_4 + 0.222 \text{ LiCl}$      |
|                          |                 | $0.284 \text{ Li}_6\text{PS}_5\text{Cl} + 0.716 \text{ Li}_{0.5}\text{Co}_1\text{O}_2 \rightarrow 0.284 \text{ Li}_3\text{PO}_4 + 0.388 \text{ Li}_2\text{S} + 0.075 \text{ Li}_2\text{SO}_4 + 0.239 \text{ Co}_3\text{S}_4 + 0.284 \text{ LiCl}$      |
|                          |                 | $0.304 \text{ Li}_6\text{PS}_5\text{Cl} + 0.696 \text{ Li}_{0.5}\text{Co}_1\text{O}_2 \rightarrow 0.304 \text{ Li}_3\text{PO}_4 + 0.435 \text{ Li}_2\text{S} + 0.348 \text{ Co}_2\text{S}_3 + 0.043 \text{ Li}_2\text{SO}_4 + 0.304 \text{ LiCl}$      |
|                          |                 | $0.333 \text{ Li}_6\text{PS}_5\text{Cl} + 0.667 \text{ Li}_{0.5}\text{Co}_1\text{O}_2 \rightarrow 0.333 \text{ CoS}_2 + 0.333 \text{ Li}_3\text{PO}_4 + 0.5 \text{ Li}_2\text{S} + 0.167 \text{ Co}_2\text{S}_3 + 0.333 \text{ LiCl}$                  |
|                          |                 |                                                                                                                                                                                                                                                        |
| Electrochemical reaction | 2.03 V          | $0.04 \text{ Li}_6\text{PS}_5\text{Cl} + \text{LiCoO}_2 \rightarrow 0.64 \text{ Li} + 0.96 \text{ CoO} + 0.2 \text{ Li}_2\text{SO}_4 + 0.04 \text{ Li}_3\text{PO}_4 + 0.04 \text{ LiCl}$                                                               |
|                          |                 | $0.188 \text{ Li}_6\text{PS}_5\text{Cl} + 0.812 \text{ LiCoO}_2 \rightarrow 0.752 \text{ Li} + 0.09 \text{ Co}_9\text{S}_8 + 0.218 \text{ Li}_2\text{SO}_4 + 0.188 \text{ Li}_3\text{PO}_4 + 0.188 \text{ LiCl}$                                       |
|                          |                 | $0.234 \text{ Li}_6\text{PS}_5\text{Cl} + 0.766 \text{ LiCoO}_2 \rightarrow 0.936 \text{ Li} + 0.255 \text{ Co}_3\text{S}_4 + 0.149 \text{ Li}_2\text{SO}_4 + 0.234 \text{ Li}_3\text{PO}_4 + 0.234 \text{ LiCl}$                                      |
|                          |                 | $0.25 \text{ Li}_6\text{PS}_5\text{Cl} + 0.75 \text{ LiCoO}_2 \rightarrow \text{Li} + 0.375 \text{ Co}_2\text{S}_3 + 0.125 \text{ Li}_2\text{SO}_4 + 0.25 \text{ Li}_3\text{PO}_4 + 0.25 \text{ LiCl}$                                                 |
|                          |                 | $0.333 \text{ Li}_6\text{PS}_5\text{Cl} + 0.667 \text{ LiCoO}_2 \rightarrow 0.333 \text{ Co}_2\text{S}_3 + 0.667 \text{ Li}_2\text{S} + 0.333 \text{ Li}_3\text{PO}_4 + 0.333 \text{ LiCl}$                                                            |
|                          | 4.07 V          | $0.033 \text{ Li}_6\text{PS}_5\text{Cl} + 0.967 \text{ Li}_{0.5}\text{Co}_1\text{O}_2 \rightarrow 0.65 \text{ Li} + 0.017 \text{ Co}_3(\text{PO}_4)_2 + 0.167 \text{ CoSO}_4 + 0.033 \text{ LiClO}_4 + 0.25 \text{ Co}_3\text{O}_4$                    |
|                          |                 | $0.037 \text{ Li}_6\text{PS}_5\text{Cl} + 0.963 \text{ Li}_{0.5}\text{Co}_1\text{O}_2 \rightarrow 0.704 \text{ Li} + 0.019 \text{ Co}_3(\text{PO}_4)_2 + 0.185 \text{ CoSO}_4 + 0.037 \text{ ClO}_2 + 0.241 \text{ Co}_3\text{O}_4$                    |
|                          |                 | $0.043 \text{ Li}_6\text{PS}_5\text{Cl} + 0.957 \text{ Li}_{0.5}\text{Co}_1\text{O}_2 \rightarrow 0.739 \text{ Li} + 0.217 \text{ CoSO}_4 + 0.043 \text{ Co}_2\text{PbClO}_4 + 0.217 \text{ Co}_3\text{O}_4$                                           |
|                          |                 | $0.056 \text{ Li}_6\text{PS}_5\text{Cl} + 0.944 \text{ Li}_{0.5}\text{Co}_1\text{O}_2 \rightarrow 0.806 \text{ Li} + 0.556 \text{ CoO} + 0.278 \text{ CoSO}_4 + 0.056 \text{ Co}_2\text{PbClO}_4$                                                      |
|                          |                 | $0.121 \text{ Li}_6\text{PS}_5\text{Cl} + 0.879 \text{ Li}_{0.5}\text{Co}_1\text{O}_2 \rightarrow 1.163 \text{ Li} + 0.035 \text{ Co}_9\text{S}_8 + 0.319 \text{ CoSO}_4 + 0.121 \text{ Co}_2\text{PbClO}_4$                                           |
|                          |                 | $0.137 \text{ Li}_6\text{PS}_5\text{Cl} + 0.863 \text{ Li}_{0.5}\text{Co}_1\text{O}_2 \rightarrow 1.255 \text{ Li} + 0.294 \text{ CoSO}_4 + 0.137 \text{ Co}_2\text{PbClO}_4 + 0.098 \text{ Co}_3\text{S}_4$                                           |
|                          |                 | $0.143 \text{ Li}_6\text{PS}_5\text{Cl} + 0.857 \text{ Li}_{0.5}\text{Co}_1\text{O}_2 \rightarrow 1.286 \text{ Li} + 0.143 \text{ Co}_2\text{S}_3 + 0.286 \text{ CoSO}_4 + 0.143 \text{ Co}_2\text{PbClO}_4$                                           |
|                          |                 | $0.158 \text{ Li}_6\text{PS}_5\text{Cl} + 0.842 \text{ Li}_{0.5}\text{Co}_1\text{O}_2 \rightarrow 1.368 \text{ Li} + 0.263 \text{ CoS}_2 + 0.263 \text{ CoSO}_4 + 0.158 \text{ Co}_2\text{PbClO}_4$                                                    |
|                          |                 | $0.305 \text{ Li}_6\text{PS}_5\text{Cl} + 0.695 \text{ Li}_{0.5}\text{Co}_1\text{O}_2 \rightarrow 2.178 \text{ Li} + 0.085 \text{ CoS}_2 + 0.305 \text{ Co}_2\text{PbClO}_4 + 0.169 \text{ S}_8\text{O}$                                               |
|                          |                 | $0.404 \text{ Li}_6\text{PS}_5\text{Cl} + 0.596 \text{ Li}_{0.5}\text{Co}_1\text{O}_2 \rightarrow 2.725 \text{ Li} + 0.101 \text{ CoP}_4\text{O}_{11} + 0.494 \text{ CoS}_2 + 0.079 \text{ S}_8\text{O} + 0.404 \text{ SCl}$                           |
|                          |                 | $0.443 \text{ Li}_6\text{PS}_5\text{Cl} + 0.557 \text{ Li}_{0.5}\text{Co}_1\text{O}_2 \rightarrow 2.934 \text{ Li} + 0.074 \text{ CoP}_4\text{O}_{11} + 0.484 \text{ CoS}_2 + 0.156 \text{ S}_8\text{O} + 0.148 \text{ PbCl}_3\text{O}$                |
|                          |                 | $0.771 \text{ Li}_6\text{PS}_5\text{Cl} + 0.229 \text{ Li}_{0.5}\text{Co}_1\text{O}_2 \rightarrow 4.743 \text{ Li} + 0.229 \text{ CoS}_2 + 0.257 \text{ P}_2\text{S}_7 + 0.2 \text{ S}_8\text{O} + 0.257 \text{ PbCl}_3\text{O}$                       |
|                          |                 | $0.871 \text{ Li}_6\text{PS}_5\text{Cl} + 0.129 \text{ Li}_{0.5}\text{Co}_1\text{O}_2 \rightarrow 5.29 \text{ Li} + 0.129 \text{ CoS}_2 + 0.29 \text{ P}_2\text{S}_7 + 0.29 \text{ PbCl}_3 + 0.258 \text{ S}_8\text{O}$                                |
|                          |                 | $0.973 \text{ Li}_6\text{PS}_5\text{Cl} + 0.027 \text{ Li}_{0.5}\text{Co}_1\text{O}_2 \rightarrow 5.851 \text{ Li} + 0.027 \text{ CoS}_2 + 0.486 \text{ P}_2\text{S}_7 + 0.054 \text{ S}_8\text{O} + 0.973 \text{ SCl}$                                |

**Table S5.** Comparison of battery performance of cells assembled with different SSEs and cathode in sulfide-based ASSBs.

| No. | Cathode                                                                   | SSEs                               | Temp (°C) | Discharge compacity (mAh g <sup>-1</sup> ) | Capacity retention (%)   | Ref. |
|-----|---------------------------------------------------------------------------|------------------------------------|-----------|--------------------------------------------|--------------------------|------|
| 1   | LiNi <sub>0.8</sub> Co <sub>0.1</sub> Mn <sub>0.1</sub> O <sub>2</sub>    | β-Li <sub>3</sub> PS <sub>4</sub>  | 25 °C     | 124 (0.1 C)                                | 65.3 (0.1C, 50 cycles)   | 15   |
| 2   | LiNi <sub>0.8</sub> Co <sub>0.1</sub> Mn <sub>0.1</sub> O <sub>2</sub>    | β-Li <sub>3</sub> PS <sub>4</sub>  | 25 °C     | 127 (0.1 C)                                | 78.7 (0.1C, 25 cycles)   | 16   |
| 3   | LiNi <sub>0.8</sub> Co <sub>0.1</sub> Mn <sub>0.1</sub> O <sub>2</sub>    | LiGePS                             | 35 °C     | 155.4 (0.1 C)                              | 50.1 (0.3C, 100 cycles)  | 17   |
| 4   | LiNi <sub>0.8</sub> Co <sub>0.1</sub> Mn <sub>0.1</sub> O <sub>2</sub>    | Li <sub>6</sub> PS <sub>5</sub> Cl | RT        | 159 (0.1 C)                                | 90 (0.1C, 600 cycles)    | 18   |
| 5   | LiNi <sub>0.83</sub> Mn <sub>0.06</sub> Co <sub>0.11</sub> O <sub>2</sub> | Li <sub>6</sub> PS <sub>5</sub> Cl | 30 °C     | 204(0.2 C)                                 | /                        | 19   |
| 6   | LiNi <sub>0.88</sub> Co <sub>0.09</sub> Mn <sub>0.03</sub> O <sub>2</sub> | Li <sub>6</sub> PS <sub>5</sub> Cl | 33 °C     | 200.7 (0.1 C)                              | 86.5 (1C, 500 cycles)    | 20   |
| 7   | LiNi <sub>0.6</sub> Co <sub>0.2</sub> Mn <sub>0.2</sub> O <sub>2</sub>    | β-Li <sub>3</sub> PS <sub>4</sub>  | 25 °C     | 123 (0.1 C)                                | /                        | 21   |
| 8   | LiNi <sub>0.6</sub> Co <sub>0.2</sub> Mn <sub>0.2</sub> O <sub>2</sub>    | β-Li <sub>3</sub> PS <sub>4</sub>  | 25 °C     | 106 (0.1 C)                                | 64 (0.1C, 100 cycles)    | 22   |
| 9   | LiNi <sub>0.6</sub> Co <sub>0.2</sub> Mn <sub>0.2</sub> O <sub>2</sub>    | Li <sub>6</sub> PS <sub>5</sub> Cl | RT        | 141(0.05 C)                                | 97 (0.05C, 20 cycles)    | 23   |
| 10  | LiNi <sub>0.6</sub> Co <sub>0.2</sub> Mn <sub>0.2</sub> O <sub>2</sub>    | Li <sub>6</sub> PS <sub>5</sub> Cl | 30 °C     | 155 (0.1 C)                                | /                        | 24   |
| 11  | LiNi <sub>0.6</sub> Co <sub>0.2</sub> Mn <sub>0.2</sub> O <sub>2</sub>    | Li <sub>6</sub> PS <sub>5</sub> Cl | 45 °C     | 161 (0.2 C)                                | 45.5 (0.2C, 200 cycles)  | 25   |
| 12  | LiNi <sub>0.5</sub> Mn <sub>1.5</sub> O <sub>4</sub>                      | LGPS                               | 25 °C     | 80 (0.05 C)                                | 70.1 (0.05 C, 10 cycles) | 26   |
| 13  | LiNi <sub>0.5</sub> Mn <sub>1.5</sub> O <sub>4</sub>                      | Li <sub>6</sub> PS <sub>5</sub> Cl | 30 °C     | 83.4 (0.1 C)                               | 70(0.1 C, 100 cycles)    | 27   |
| 14  | LiMn <sub>2</sub> O <sub>4</sub>                                          | Li <sub>6</sub> PS <sub>5</sub> Cl | /         | 73 (0.1 C)                                 | 96 (0.1 C, 22 cycles)    | 28   |
| 15  | LiCoO <sub>2</sub>                                                        | LGPS                               | 30 °C     | 119(0.1 C)                                 | 55(0.1 C, 300 cycles)    | 29   |
| 16  | LiCoO <sub>2</sub>                                                        | LGPS                               | /         | 102(0.1 C)                                 | 80(0.1 C, 100 cycles)    | 30   |
| 17  | LiCoO <sub>2</sub>                                                        | β-Li <sub>3</sub> PS <sub>4</sub>  | 25 °C     | 82                                         | 97.56(10 cycles)         | 31   |
| 18  | LiCoO <sub>2</sub>                                                        | Li <sub>6</sub> PS <sub>5</sub> Cl | 30 °C     | 119.6(0.05 C)                              | /                        | 32   |
| 19  | LiCoO <sub>2</sub>                                                        | Li <sub>6</sub> PS <sub>5</sub> Cl | 30 °C     | 118 (0.2 C)                                | 88.8(0.2 C, 50 cycles)   | 33   |
| 20  | LiCoO <sub>2</sub>                                                        | Li <sub>6</sub> PS <sub>5</sub> Cl | 30 °C     | 125.9 (0.2 C)                              | 74.74(0.2 C, 100 cycles) | 34   |
| 21  | Li <sub>2</sub> RuO <sub>3</sub>                                          | β-Li <sub>3</sub> PS <sub>4</sub>  | 100 °C    | 220 (0.07 C)                               | 76 (0.07 C, 95 cycles)   | 35   |
| 22  | Li <sub>2</sub> RuO <sub>3</sub>                                          | Li <sub>6</sub> PS <sub>5</sub> Cl | RT        | 257 (0.05C)                                | 90 (1 C, 1000 cycle)     | 36   |

**Table S6.** Numbers and percentages of compounds for each category that pass each filter of the screening.

| Filter         | Polyanionic oxides | Halides        | Non-polyanionic oxides | Total |
|----------------|--------------------|----------------|------------------------|-------|
| 2 <sup>a</sup> | 587<br>(10.4%)     | 231<br>(21.0%) | 377<br>(9.4%)          | 1195  |
| 3 <sup>b</sup> | 203<br>(34.6%)     | 130<br>(56.3%) | 151<br>(40.1%)         | 484   |
| 4 <sup>c</sup> | 120<br>(59.1%)     | 96<br>(73.8%)  | 14<br>(9.3%)           | 230   |
| 5 <sup>d</sup> | 25<br>(20.8%)      | 21<br>(21.9%)  | 2<br>(14.3%)           | 48    |

<sup>a</sup>Phase stability screening.

<sup>b</sup>Exclude the elements trend to form electronically conductive products (Ni, Co, Mn, Ti, V, Fe, Cu...).

<sup>c</sup>Chemical stability screening  $\Delta E_{D,m} \geq -0.165$  eV/atom with Li<sub>6</sub>PS<sub>5</sub>Cl and NCM.

<sup>d</sup>CVAD+BVSE < 0.6 eV.

**Table S7.** List of 48 compounds that pass ionic conductivity screening (filter 5). $\Delta E_{D,mutual}$  is the reaction energy of the specific material with  $\text{Li}_6\text{PS}_5\text{Cl}$  and fully lithiated NCM/LCO in eV/atom.TR is the threshold size of the compounds along a, b, and c direction / $\text{\AA}$ .

BVSE is the diffusion energy barrier of the material in 1D, 2D, and 3D /eV.

| Compounds                                                 | $\Delta E_{D,mutual}$ |        |        | TR   |      |      | BVSE |      |      |
|-----------------------------------------------------------|-----------------------|--------|--------|------|------|------|------|------|------|
|                                                           | LPSCI                 | NCM    | LCO    | a    | b    | c    | 1D   | 2D   | 3D   |
| $\text{Li}_2\text{ZnSiO}_4$                               | -0.151                | 0.000  | 0.000  | 0.68 | 0.64 | 0.68 | 0.59 | 0.59 | 0.64 |
| $\text{LiTaSiO}_5$                                        | -0.067                | -0.055 | -0.006 | 0.74 | 0.74 | 0.74 | 0.35 | 0.35 | 1.26 |
| $\text{Li}_4\text{Al}_3\text{Si}_3\text{O}_{12}\text{Cl}$ | 0.000                 | -0.053 | 0.000  | 0.65 | 0.65 | 0.65 | 0.49 | 0.49 | 0.49 |
| $\text{Li}_3\text{PO}_4$                                  | 0.000                 | 0.000  | 0.000  | 0.64 | 0.60 | 0.62 | 0.55 | 0.55 | 1.04 |
| $\text{Li}_3\text{In}_2(\text{PO}_4)_3$                   | -0.155                | -0.083 | -0.037 | 0.69 | 0.86 | 0.69 | 0.56 | 0.60 | 0.63 |
| $\text{LiBi}(\text{PO}_3)_4$                              | -0.152                | -0.127 | -0.093 | 0.95 | 0.92 | 0.95 | 0.56 | 0.56 | 0.92 |
| $\text{Li}_3\text{Sc}_2(\text{PO}_4)_3$                   | -0.085                | -0.068 | -0.020 | 0.66 | 0.68 | 0.72 | 0.45 | 0.54 | 0.61 |
| $\text{LiZr}_2(\text{PO}_4)_3$                            | -0.093                | -0.086 | -0.034 | 0.91 | 0.91 | 0.91 | 0.56 | 0.56 | 0.56 |
| $\text{Li}_4\text{P}_2\text{O}_7$                         | -0.072                | -0.074 | -0.040 | 0.75 | 0.75 | 0.75 | 0.28 | 0.49 | 0.49 |
| $\text{LiInP}_2\text{O}_7$                                | -0.15                 | -0.098 | -0.052 | 0.91 | 0.81 | 0.58 | 0.53 | 0.59 | 1.16 |
| $\text{LiScP}_2\text{O}_7$                                | -0.098                | -0.09  | -0.044 | 0.92 | 0.88 | 0.60 | 0.43 | 0.54 | 1.07 |
| $\text{Li}_4\text{Be}_3\text{P}_3\text{O}_{12}\text{Cl}$  | -0.064                | -0.067 | -0.030 | 0.59 | 0.59 | 0.59 | 0.56 | 0.56 | 0.56 |
| $\text{Li}_4\text{Be}_3\text{P}_3\text{O}_{12}\text{Br}$  | -0.063                | -0.066 | -0.028 | 0.55 | 0.55 | 0.55 | 0.60 | 0.60 | 0.60 |
| $\text{Li}_2\text{Mg}_2(\text{SO}_4)_3$                   | -0.161                | -0.061 | -0.049 | 0.68 | 0.81 | 0.68 | 0.32 | 0.32 | 0.55 |
| $\text{Li}_3\text{BO}_3$                                  | -0.102                | 0.000  | 0.000  | 0.64 | 0.61 | 0.61 | 0.40 | 0.49 | 0.49 |
| $\text{Li}_3\text{Sc}(\text{BO}_3)_2$                     | -0.086                | -0.048 | -0.019 | 0.69 | 0.69 | 0.69 | 0.53 | 0.53 | 0.74 |
| $\text{Li}_3\text{Bi}(\text{BO}_3)_2$                     | -0.161                | -0.045 | -0.014 | 0.77 | 0.78 | 0.77 | 0.57 | 0.60 | 0.69 |
| $\text{Li}_6\text{Nd}(\text{BO}_3)_3$                     | -0.089                | -0.037 | 0.000  | 0.72 | 0.72 | 0.69 | 0.44 | 0.59 | 0.94 |
| $\text{Li}_6\text{Y}(\text{BO}_3)_3$                      | -0.087                | -0.038 | -0.003 | 0.68 | 0.68 | 0.68 | 0.43 | 0.60 | 0.94 |
| $\text{Li}_2\text{Al}(\text{BO}_2)_5$                     | 0.000                 | -0.06  | -0.041 | 0.86 | 0.86 | 0.86 | 0.51 | 0.51 | 0.56 |
| $\text{Li}_2\text{AlBO}_4$                                | -0.043                | -0.047 | -0.019 | 0.69 | 0.67 | 0.69 | 0.26 | 0.47 | 1.10 |
| $\text{Li}_6\text{B}_4\text{O}_9$                         | -0.051                | -0.047 | -0.015 | 0.70 | 0.70 | 0.70 | 0.33 | 0.55 | 0.55 |
| $\text{Li}_{10}\text{B}_{14}\text{O}_{25}\text{Cl}_2$     | -0.031                | -0.062 | -0.057 | 0.55 | 0.55 | 0.55 | 0.53 | 0.53 | 0.53 |
| $\text{Li}_2\text{B}_3\text{O}_4\text{F}_3$               | -0.070                | -0.089 | -0.089 | 0.69 | 1.08 | 0.68 | 0.23 | 0.59 | 0.82 |
| $\text{Li}_4\text{B}_7\text{O}_{12}\text{Cl}$             | 0.000                 | -0.067 | -0.066 | 0.59 | 0.59 | 0.57 | 0.47 | 0.47 | 0.47 |
| $\text{LiAuI}_4$                                          | -0.110                | 0.000  | 0.000  | 0.50 | 0.50 | 0.50 | 0.32 | 0.32 | 0.62 |
| $\text{LiGal}_4$                                          | -0.115                | -0.063 | -0.040 | 0.53 | 0.50 | 0.48 | 0.33 | 0.35 | 0.35 |
| $\text{LiInI}_4$                                          | -0.104                | -0.042 | 0.000  | 0.60 | 0.58 | 0.55 | 0.36 | 0.37 | 0.37 |
| $\text{K}_2\text{LiAlF}_6$                                | -0.087                | -0.054 | -0.010 | 1.54 | 1.54 | 0.29 | 0.28 | 0.28 | 1.16 |
| $\text{Li}_2\text{BeF}_4$                                 | 0.000                 | -0.075 | -0.039 | 0.65 | 0.65 | 1.25 | 0.20 | 0.20 | 0.20 |
| $\text{Li}_2\text{SiF}_6$                                 | -0.102                | -0.122 | -0.075 | 0.58 | 0.58 | 0.57 | 0.46 | 0.49 | 0.49 |
| $\text{Li}_3\text{CrF}_6$                                 | -0.147                | -0.107 | -0.066 | 0.57 | 0.57 | 0.60 | 0.44 | 0.44 | 0.53 |
| $\text{Li}_3\text{ScF}_6$                                 | -0.085                | -0.067 | -0.024 | 0.58 | 0.58 | 0.57 | 0.50 | 0.52 | 0.52 |
| $\text{Li}_4\text{ZrF}_8$                                 | -0.092                | -0.086 | -0.040 | 0.57 | 0.60 | 0.57 | 0.36 | 0.37 | 0.40 |
| $\text{LiBF}_4$                                           | -0.103                | -0.157 | -0.144 | 0.76 | 0.76 | 0.84 | 0.17 | 0.17 | 0.17 |

|                                                  |        |        |        |      |      |      |      |      |      |
|--------------------------------------------------|--------|--------|--------|------|------|------|------|------|------|
| $\text{Li}_3\text{Na}_3\text{Al}_2\text{F}_{12}$ | -0.072 | -0.058 | -0.018 | 0.61 | 0.61 | 0.61 | 0.22 | 0.22 | 0.22 |
| $\text{Li}_3\text{Na}_3\text{Cr}_2\text{F}_{12}$ | -0.145 | -0.079 | -0.036 | 0.62 | 0.62 | 0.62 | 0.22 | 0.22 | 0.22 |
| $\text{Li}_3\text{Na}_3\text{Sc}_2\text{F}_{12}$ | -0.09  | -0.055 | -0.014 | 0.63 | 0.63 | 0.63 | 0.25 | 0.25 | 0.25 |
| $\text{Li}_2\text{RbBe}_2\text{F}_7$             | -0.054 | -0.068 | -0.031 | 0.55 | 0.74 | 0.55 | 0.46 | 0.46 | 0.91 |
| $\text{LiCsCl}_2$                                | 0.000  | 0.000  | 0.000  | 0.55 | 0.52 | 0.57 | 0.43 | 0.43 | 0.91 |
| $\text{Li}_3\text{InCl}_6$                       | -0.126 | -0.063 | -0.014 | 0.84 | 0.84 | 0.84 | 0.49 | 0.49 | 0.49 |
| $\text{LiAlCl}_4$                                | -0.129 | -0.156 | -0.117 | 0.64 | 0.57 | 0.56 | 0.30 | 0.30 | 0.32 |
| $\text{LiGdCl}_4$                                | -0.120 | -0.093 | -0.045 | 0.49 | 0.49 | 0.49 | 0.41 | 0.41 | 0.41 |
| $\text{Li}_3\text{ErBr}_6$                       | -0.101 | -0.086 | -0.046 | 0.54 | 0.54 | 0.48 | 0.36 | 0.36 | 0.45 |
| $\text{LiGaBr}_4$                                | -0.140 | -0.081 | -0.024 | 0.62 | 0.55 | 0.55 | 0.33 | 0.36 | 0.36 |
| $\text{LiRbBr}_2$                                | 0.000  | 0.000  | 0.000  | 0.64 | 0.45 | 0.64 | 0.25 | 0.53 | 0.72 |
| $\text{Li}_3\text{NbO}_4$                        | -0.148 | 0.000  | 0.000  | 0.54 | 0.54 | 0.54 | 0.39 | 0.39 | 0.39 |
| $\text{Li}_5\text{TaO}_5$                        | -0.132 | 0.000  | 0.000  | 0.52 | 0.73 | 0.54 | 0.51 | 0.54 | 1.28 |

## Reference

1. M. A. Green, *J. Appl. Phys.*, 1990, **67**, 2944-2954.
2. V. A. Blatov and A. P. Shevchenko, *Acta Cryst.*, 2003, **59**, 34-44.
3. B. He, A. Ye, S. Chi, P. Mi, Y. Ran, L. Zhang, X. Zou, B. Pu, Q. Zhao, Z. Zou, D. Wang, W. Zhang, J. Zhao, M. Avdeev and S. Shi, *Sci. Data*, 2020, **7**, 153.
4. J. Gao, G. Chu, M. He, S. Zhang, R. Xiao, H. Li and L. Chen, *Science China Physics, Mechanics & Astronomy*, 2014, **57**, 1526-1536.
5. X. He, Q. Bai, Y. Liu, A. M. Nolan, C. Ling and Y. Mo, *Adv. Energy Mater.*, 2019, **9**, 1902078.
6. B. He, S. Chi, A. Ye, P. Mi, L. Zhang, B. Pu, Z. Zou, Y. Ran, Q. Zhao, D. Wang, W. Zhang, J. Zhao, S. Adams, M. Avdeev and S. Shi, *Sci. Data*, 2020, **7**, 151.
7. L. Zhang, B. He, Q. Zhao, Z. Zou, S. Chi, P. Mi, A. Ye, Y. Li, D. Wang, M. Avdeev, S. Adams and S. Shi, *Adv. Funct. Mater.*, 2020, **30**, 2003087.
8. B. He, P. Mi, A. Ye, S. Chi, Y. Jiao, L. Zhang, B. Pu, Z. Zou, W. Zhang, M. Avdeev, S. Adams, J. Zhao and S. Shi, *Acta Materialia*, 2021, **203**, 116490.
9. M. Avdeev, M. Sale, S. Adams and R. P. Rao, *Solid State Ionics*, 2012, **225**, 43-46.
10. Y. Nishitani, S. Adams, K. Ichikawa and T. Tsujita, *Solid State Ionics*, 2018, **315**, 111-115.
11. I. D. Brown and D. Altermatt, *Acta Cryst.*, 1985, **41**, 244-247.
12. S. Adams and J. Swenson, *Phys. Rev. Lett.* 2000, **84**, 4144.
13. S. Adams and J. Stefan, *J. power sources*, 2006, **159**, 200-204.
14. S. Adams and J. Swenson, *J. Phy.: Conden. Matter*, 2005, **17**, S87.
15. R. Koerver, I. Aygün, T. Leichtweiß, C. Dietrich, W. Zhang, J. O. Binder, P. Hartmann, W. G. Zeier and J. Janek, *Chem. Mater.*, 2017, **29**, 5574-5582.
16. R. Koerver, F. Walther, I. Aygün, J. Sann, C. Dietrich, W. G. Zeier and J. Janek, *J. Mater. Chem. A*, 2017, **5**, 22750-22760.
17. X. Li, Q. Sun, Z. Wang, D. Song, H. Zhang, X. Shi, C. Li, L. Zhang and L. Zhu, *J. Power Sources*, 2020, **456**, 227997.
18. Y. Zhang, X. Sun, D. Cao, G. Gao, Z. Yang, H. Zhu and Y. Wang, *Energy Storage Materials*, 2021, **41**, 505-514.
19. C. Doerrer, I. Capone, S. Narayanan, J. Liu, C. R. M. Grovenor, M. Pasta and P. S. Grant, *ACS Appl. Mater. Interfaces*, 2021, **13**, 37809-37815.
20. Y. Wang, Z. Wang, D. Wu, Q. Niu, P. Lu, T. Ma, Y. Su, L. Chen, H. Li and F. Wu, *eScience*, 2022, **2**, 537-545.
21. F. Strauss, T. Bartsch, L. de Biasi, A. Y. Kim, J. Janek, P. Hartmann and T. Brezesinski, *ACS Energy Lett.*, 2018, **3**, 992-996.
22. A. Y. Kim, F. Strauss, T. Bartsch, J. H. Teo, T. Hatsukade, A. Mazilkin, J. Janek, P. Hartmann and T. Brezesinski, *Chemistry of Materials*, 2019, **31**, 9664-9672.
23. T. Koç, F. Marchini, G. Rouse, R. Dugas and J.-M. Tarascon, *ACS Appl. Energy Mater.*, 2021, **4**, 13575-13585.
24. Y. J. Nam, D. Y. Oh, S. H. Jung and Y. S. Jung, *Journal of Power Sources*, 2018, **375**, 93-101.
25. F. Walther, F. Strauss, X. Wu, B. Mogwitz, J. Hertle, J. Sann, M. Rohnke, T. Brezesinski and J. Janek, *Chem. Mater.*, 2021, **33**, 2110-2125.
26. G. Oh, M. Hirayama, O. Kwon, K. Suzuki and R. Kanno, *Chem. Mater.*, 2016, **28**, 2634-2640.
27. H. J. Lee, X. Liu, Y. Chart, P. Tang, J. G. Bae, S. Narayanan, J. H. Lee, R. J. Potter, Y. Sun and M. Pasta, *Nano Lett.*, 2022, **22**, 7477-7483.

28. J. r. m. Auvergniot, A. Cassel, J.-B. Ledeuil, V. Vialle, V. Seznec and R. m. Dedryvère, *Chem. Mater.*, 2017, **29**, 3883–3890.
29. W. Zhang, F. H. Richter, S. P. Culver, T. Leichtweiss, J. G. Lozano, C. Dietrich, P. G. Bruce, W. G. Zeier and J. Janek, *ACS Appl. Mater. Interfaces*, 2018, **10**, 22226-22236.
30. W. Zhang, T. Leichtweiss, S. P. Culver, R. Koerver, D. Das, D. A. Weber, W. G. Zeier and J. Janek, *ACS Appl. Mater. Interfaces*, 2017, **9**, 35888-35896.
31. Y. Ito, M. Otoyama, A. Hayashi, T. Ohtomo and M. Tatsumisago, *J. Power Sources*, 2017, **360**, 328-335.
32. L. Wang, R. Xie, B. Chen, X. Yu, J. Ma, C. Li, Z. Hu, X. Sun, C. Xu, S. Dong, T. S. Chan, J. Luo, G. Cui and L. Chen, *Nat. Commun.*, 2020, **11**, 5889.
33. S. H. Jung, K. Oh, Y. J. Nam, D. Y. Oh, P. Brüner, K. Kang and Y. S. Jung, *Chem. Mater.*, 2018, **30**, 8190-8200.
34. L. Wang, X. Sun, J. Ma, B. Chen, C. Li, J. Li, L. Chang, X. Yu, T. S. Chan, Z. Hu, M. Noked and G. Cui, *Adv. Energy Mater.*, 2021, **11**.
35. N. K, N. Y, S. A, A. Hayashi, M. Deguchi, C. Hotehama, H. Tsukasaki, S. Mori, Y. Orikasa, K. Yamamoto, Y. Uchimoto and M. Tatsumisago, *Sci. Adv.*, 2020, **6**, eaax7236.
36. Y. Q. Wu, K. Zhou, F. C. Ren, Y. Ha, Z. T. Liang, X. F. Zheng, Z. Y. Wang, W. Yang, M. J. Zhang, M. Z. Luo, C. Battaglia, W. L. Yang, L. Y. Zhu, Z. L. Gong and Y. Yang, *Energy Environ. Sci.*, 2022, **15**, 3470-3482.
